# Supplementary material for: Effect of Heat Treatment on the Properties of Wood-Derived Biocarbon Structures
Source: MDPI journal article supplement (doi:10.3390/ma11091588), 2018-09-02
Supplement: s1 [file s1]

# Supplementary

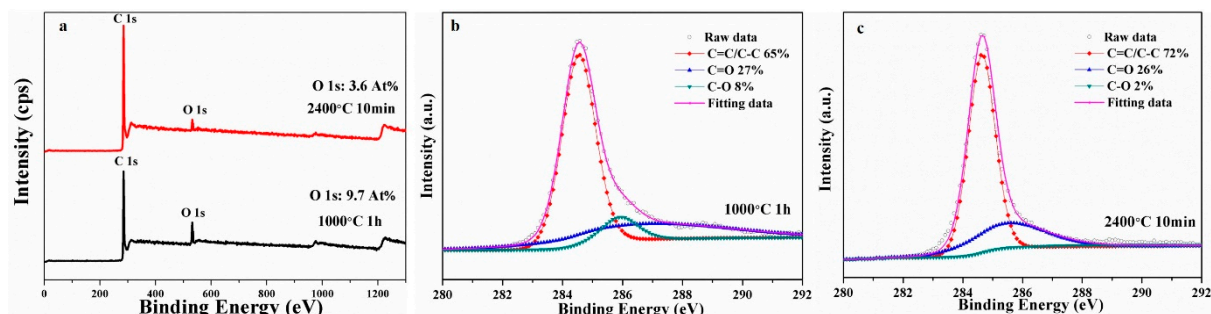

Supplementary Fig. S1. (a) Full-scan XPS of biocarbon structures obtained using different temperatures. (b) and (c) are the high resolution C 1s XPS scan of the biocarbon-1000°C and biocarbon-2400°C.

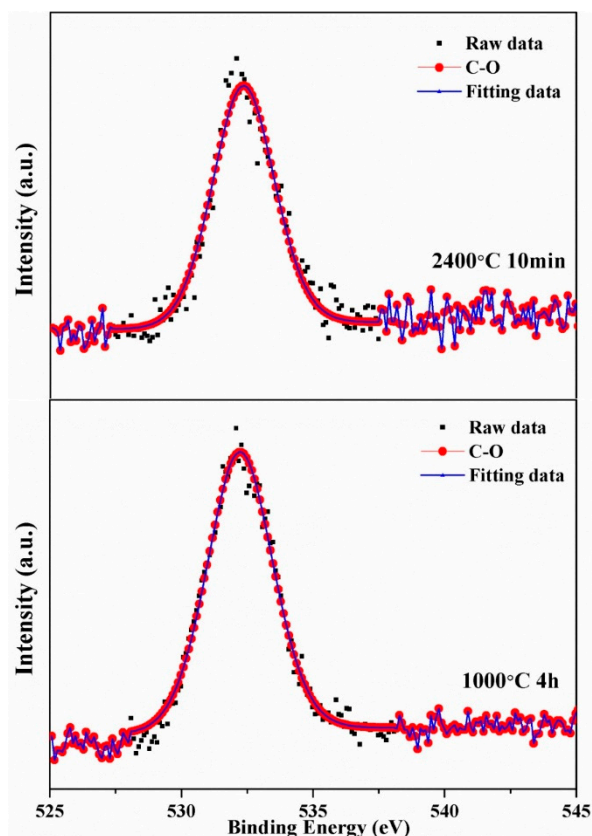

Supplementary Fig. S2. The high resolution O 1s XPS scan of the biocarbon-1000 °C and biocarbon-2400°C.
